# Supplementary material
Source: PubMed Central journal article supplement (PMC4073831)
Supplement: ja5030194_si_001.pdf [file ja5030194_si_001.pdf]

Supporting Information for

**A Chemically Competent Thiosulfuranyl Radical on the  
*Escherichia coli* Class III Ribonucleotide Reductase**

Yifeng Wei<sup>\*†</sup>, Guinevere Mathies<sup>†,§</sup>, Kenichi Yokoyama<sup>†,⊥</sup>, Jiahao Chen<sup>†</sup>,

Robert G. Griffin<sup>†,§</sup>, JoAnne Stubbe<sup>\*†,‡</sup>

Departments of Chemistry and Biology, and Francis Bitter National Magnet Laboratory,

Massachusetts Institute of Technology, 77 Massachusetts Avenue,

Cambridge, Massachusetts 02139-4307

## Table of Contents

- Figure S1. Active-site structures of bacteriophage T4 NrdD and *E. coli* NrdA.
- Figure S2. Minimal energy reaction profile along the S<sub>1</sub>-S<sub>2</sub> dissociation coordinate.
- Figure S3. Frontier molecular orbitals for methanethiyl radical and ethylmethylsulfide.
- Figure S4. Frontier molecular orbitals for the model thiosulfuranyl radical.
- Figure S5. Excess spin densities for methanethiyl and sulfuranyl radicals.
- Figure S6. Single turnover of NrdD with 5-[<sup>3</sup>H]-CTP in the presence and absence of formate.
- Figure S7. Alternative mechanism for nucleotide reduction by NrdD.
- Figure S8. Alignment of NrdD sequences.
- Figure S9. Homology model of *Thermotoga maritima* NrdD.
- References

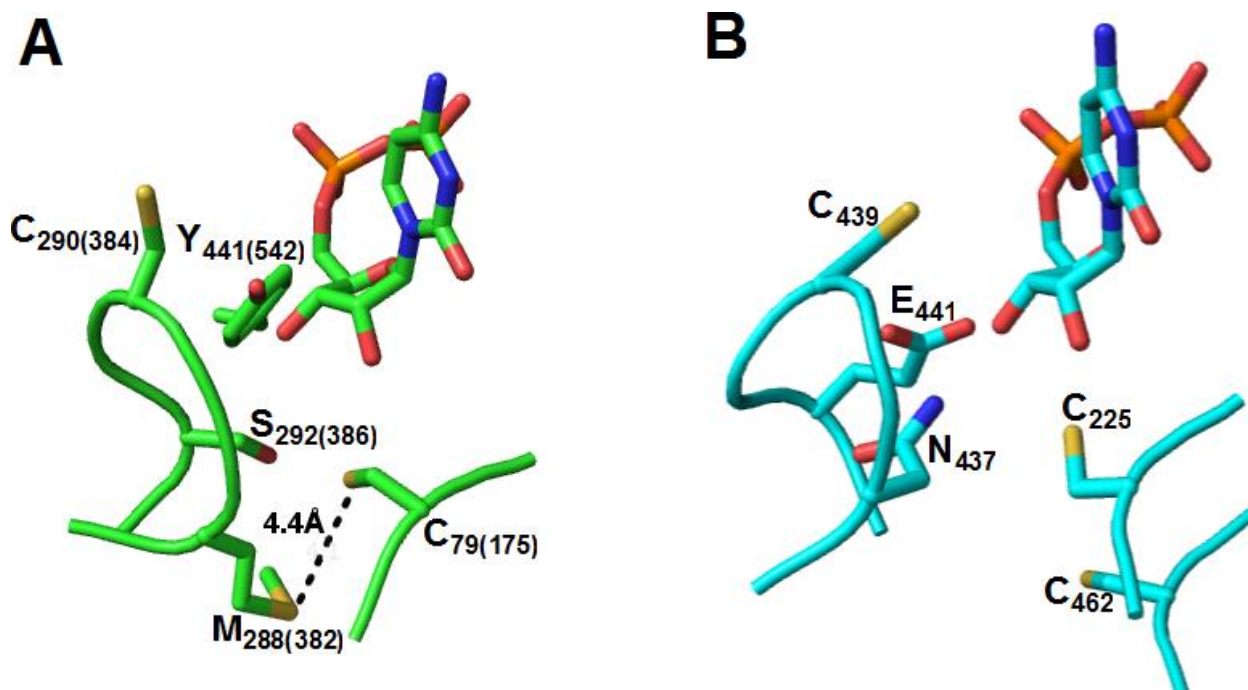

**Figure S1.** A) Active site from the crystal structure of bacteriophage T4 NrdD G580A mutant (PDB accession ID 1HK8)<sup>1</sup> (*E. coli* NrdD shares a 58% sequence identity with this protein, and its residues are numbered in the parentheses). CDP was docked by aligning the structures of NrdD and CDP-bound *E. coli* NrdA using pymol<sup>2</sup>; B) Active site from the crystal structure of *E. coli* NrdA with substrate CDP. (Zimanyi, Drennan 2013 in preparation)<sup>3</sup>.

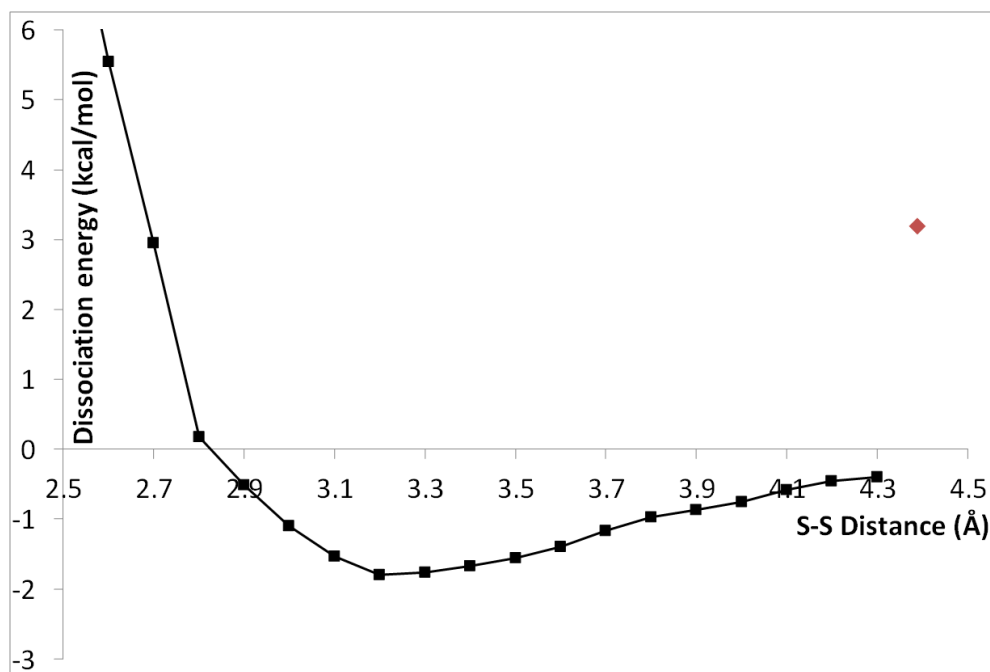

**Figure S2.** Minimal energy reaction profile along the  $S_1$ - $S_2$  dissociation coordinate (black line with squares) for the model thiosulfuranyl radical formed from methanethiyl radical and ethylmethylsulfide. Shown for comparison is the native structure (red diamond), which does not lie on the minimal energy reaction coordinate.

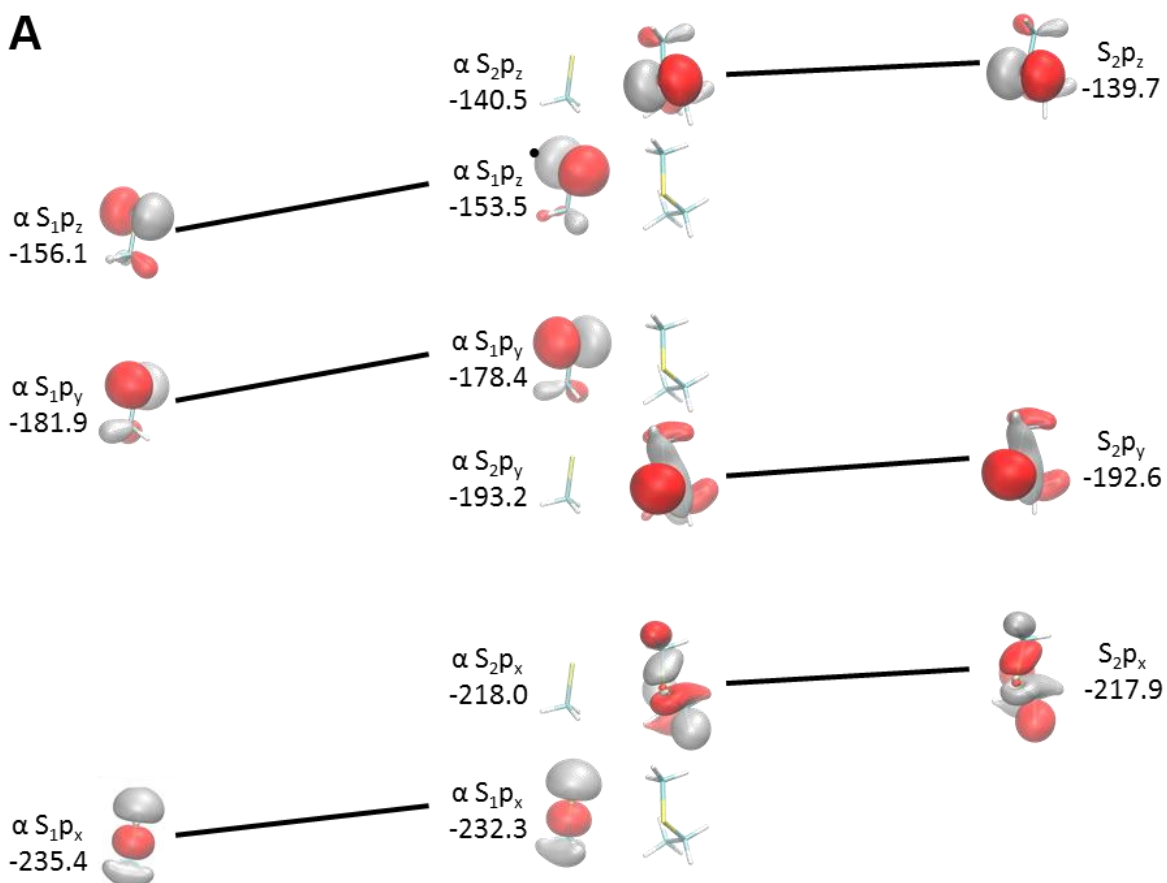

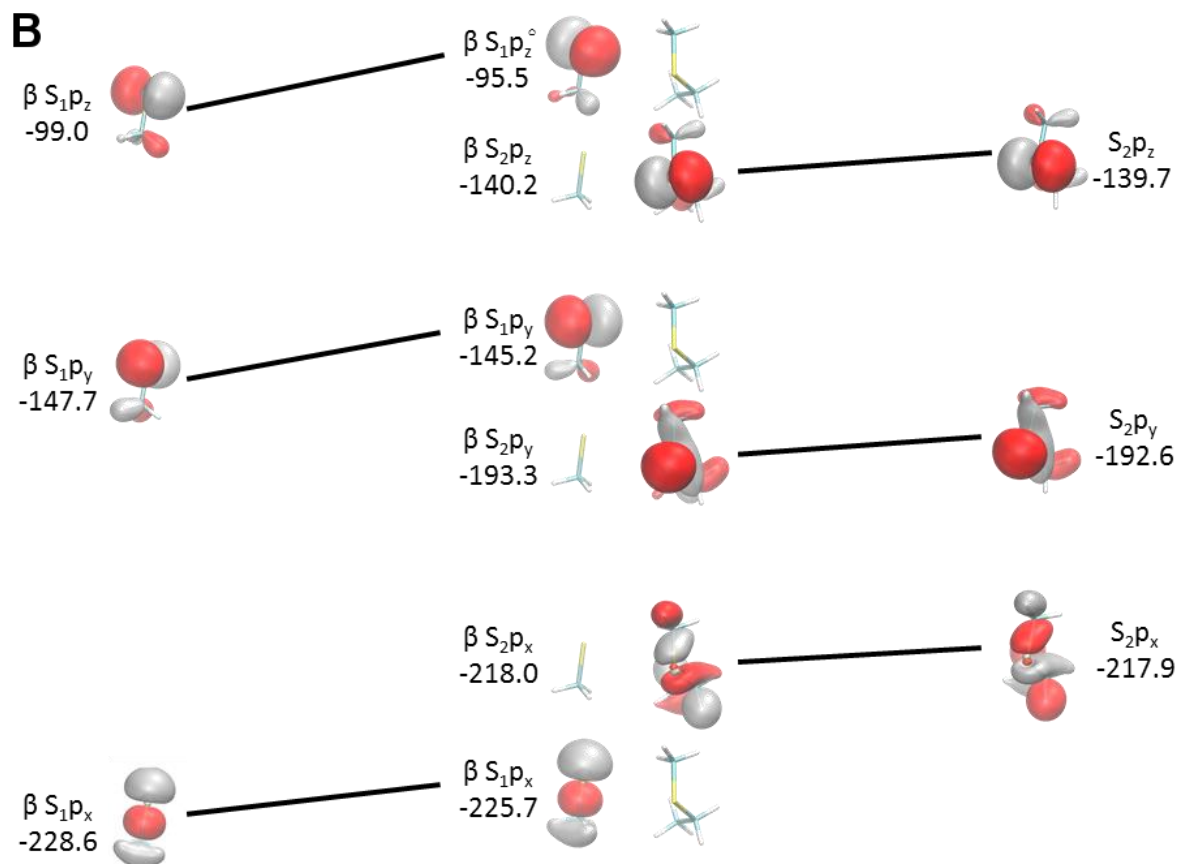

**Figure S3.** Frontier molecular orbitals for methanethiyl radical and ethylmethylsulfide constructed using coordinates from the crystal structure of T4 bacteriophage NrdD, showing essentially no interaction between the methanethiyl and ethylmethylsulfide moieties. Diagrams for the  $\alpha$  (A) and  $\beta$  (B) spin orbitals are shown separately, together with orbital energies in kcal/mol, which represent the ionization enthalpy of the electron in that orbital. For each diagram, the leftmost and rightmost orbitals represent the fragment molecular spin orbital of the methanethiyl and ethylmethylsulfide fragments respectively.  $S_n p_z$  refers to the  $3p_z$  orbital on the sulfur atom of fragment  $n$  ( $1$ =methanethiyl,  $2$ =ethylmethylsulfide).

**A**

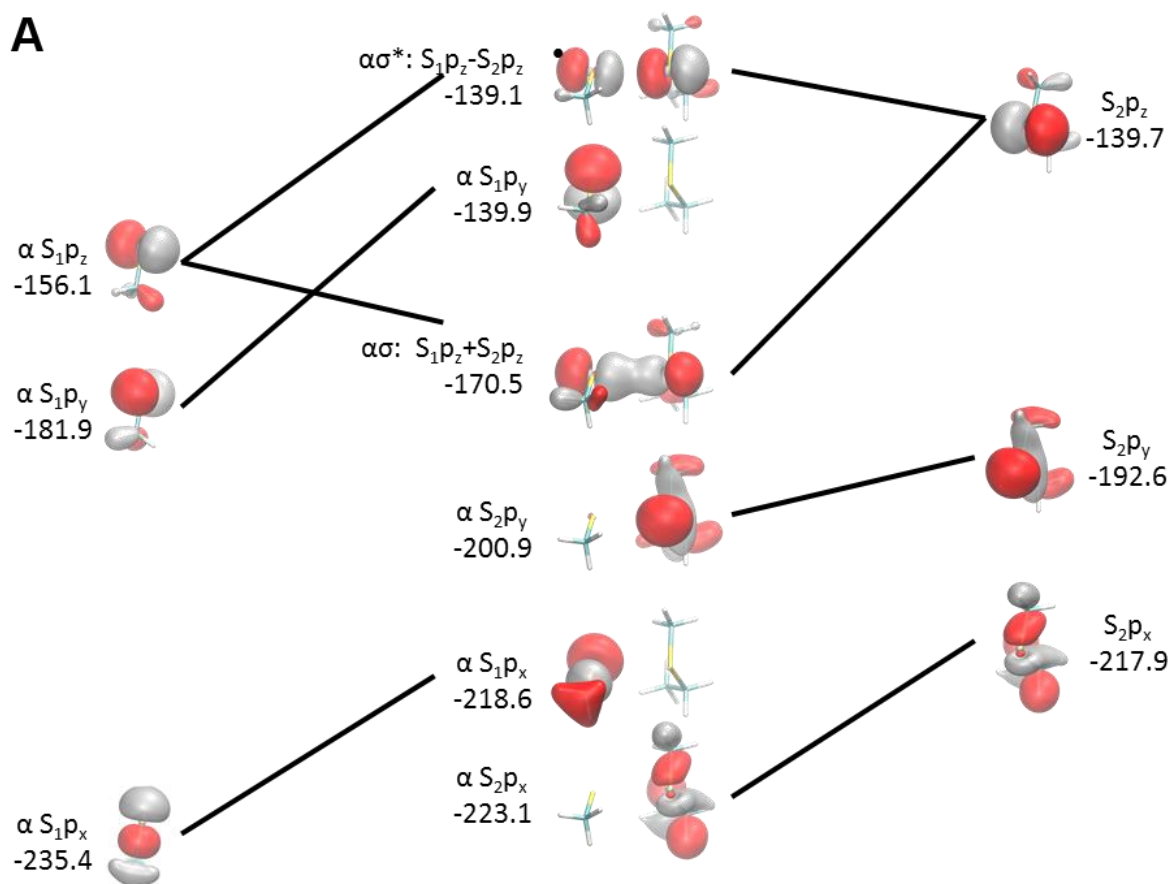

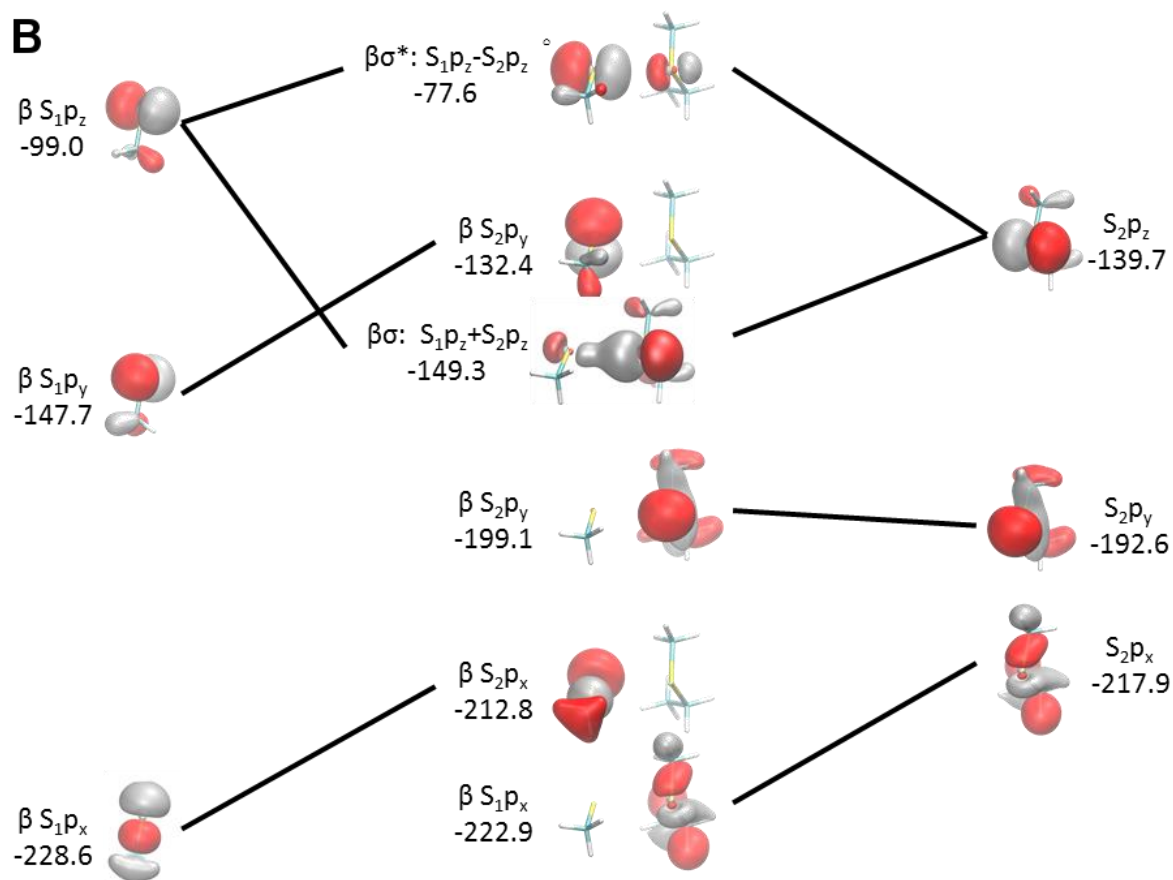

**Figure S4.** Frontier molecular orbitals for the model thiosulfuranyl radical formed from methanethiyl radical and ethylmethylsulfide. Diagrams for the  $\alpha$  (A) and  $\beta$  (B) spin orbitals are shown separately, together with orbital energies in kcal/mol, which represent the ionization enthalpy of the electron in that orbital. For each diagram, the leftmost and rightmost orbitals represent the fragment molecular spin orbital of the methanethiyl and ethylmethylsulfide fragments respectively, which mix to produce the  $\sigma$  bonding and  $\sigma^*$  antibonding orbitals.  $S_{np_z}$  refers to the  $3p_z$  orbital on the sulfur atom of fragment  $n$  ( $1$ =methanethiyl,  $2$ =ethylmethylsulfide).

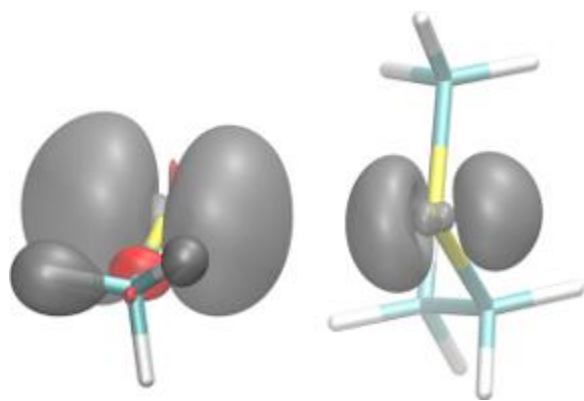

**Figure S5.** Excess spin densities for the minimal energy model, showing significant excess  $\alpha$  spin on the ethylmethylsulfide sulfur. Key: grey lobes,  $\alpha$  spin excess; red lobes,  $\beta$  spin excess.

| Condition | Product                          | Trial |      |      |      |      | Mean | Stdev |      |
|-----------|----------------------------------|-------|------|------|------|------|------|-------|------|
|           |                                  | 1     | 2    | 3    | 4    | 5    |      |       |      |
| A         | (-)HCO <sub>2</sub> <sup>-</sup> | Cyt   | 1.16 | 1.04 | 0.94 | 1.05 | 0.79 | 1.00  | 0.14 |
| B         | (-)HCO <sub>2</sub> <sup>-</sup> | dC    | 0.03 | 0.24 | 0.43 | 0.55 | 0.64 | 0.38  | 0.25 |
| C         | (+)HCO <sub>2</sub> <sup>-</sup> | Cyt   | 0.14 | 0.16 | 0.09 | 0.10 | 0.09 | 0.12  | 0.03 |
| D         | (+)HCO <sub>2</sub> <sup>-</sup> | dC    | 1.31 | 1.70 | 1.51 | 1.49 | 1.84 | 1.57  | 0.21 |
| E         | Cyt consumed                     |       | 1.02 | 0.89 | 0.85 | 0.95 | 0.70 | 0.88  | 0.12 |

**Figure S6.** Products formed after quenching of the thiosulfuranyl radical generated by reaction of NrdD with 5-[<sup>3</sup>H]-CTP and ATP, as described in Figure 8A and in text. Results for 5 separate trials are given here to show variability between replicates, averages are given Table 2. Amount of 5-[<sup>3</sup>H]-Cyt (A,C) and 5-[<sup>3</sup>H]-dC (B,D) formed per G• after quenching the thiosulfuranyl radical in the absence (A,B) or presence (C,D) for formate. Addition of formate results in the consumption of 5-[<sup>3</sup>H]-Cyt (E = A-C), being converted into 5-[<sup>3</sup>H]-dC.

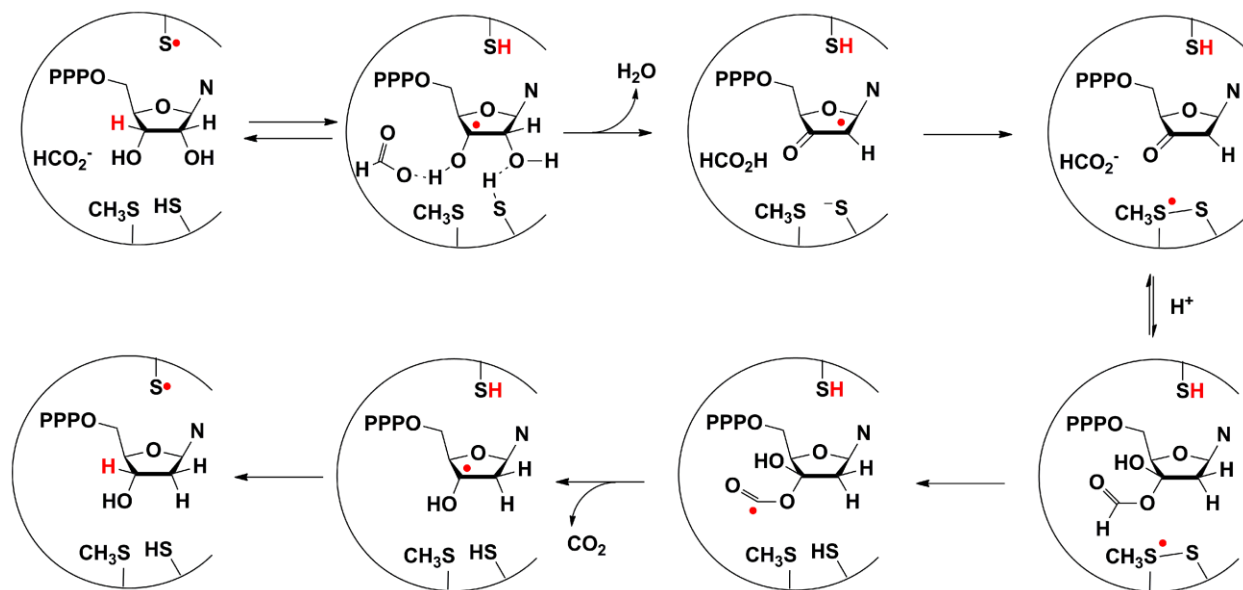

**Figure S7.** Alternative mechanism for nucleotide reduction by NrdD.

```

T4          VG-----RDIGREILTKMNAHLKQWERTGFAFSLYSTPAENLCYRFCK 454
Ecoli      FGGEHVYDNE-----QLRAKGIAIVERLRQAVDQWKEETGYGFSLYSTPSENLCDFRCR 555
Llactis    YG-PTWENN-----EAKAFTIEIVKRMHEDCEDWSKASGYHYSVYSTPSESLTDRFCR 567
Mjannaschii LG-EELHESK-----DAVKFGEKVIIEYIREYADKLKEETGLRWTVTQTPAESTAGRFAR 612
Paeruginosa SDDREGLHSE-----AGREMALALLDHVRARLVGFQEDSGHLYNLFATPAEGTTYRFAR 547
Pfuriosus  LNSPELWKEGNRRDWIEAARLMKRMVEFATEKAREWMKATRVPNWVEEVPGESAQAKLAL 460
Tmaritima  GLTTEDIDGLKYTE--EGEVFVDNVLDTIREEAEGYHEYGFTFNIEQVPAEKAAVTLAQ 508
Kstuttgartensis TG-KELHEGD-----DMIRQGLRVVSHMYTRVKEAGKKHKLKFSLLESPAESASRRLAK 641
Tacidaminovorans TG-HELHEDK-----GALDLALSVIKYEMELKCDQLSERYGVKMVLEQTPAESTAHRFK 556
Aveneficus MG-EELHEP-----SAWRFGLEIKHMMDIATEWSKETGLRWVITQTPAESTAHRFK 550
Mbarkeri   TG-YQIHESP-----VAYKLAI RAMFEMKMHAQKLSKETGMEIALARTPAETTAQRFAV 626
          : . : *.* :.

T4          -YDIKQLALECASKRMYPDIIISAKNNKAITGSSVPVSPGERSFLSVWKDSTGNEILD-- 307
Ecoli      -YDIKQLALECASKRMYPDILNYDQVVKVTGS--FKTPGERSFLGVWENENGEQIHD-- 401
Llactis    -YDIKELALECSTKRMYPDILSYDKIVELTGS--FKASGERSFLQGWDKENGNDVTA-- 415
Mjannaschii NKELMYKIHQLSAKFGIPYFINMLPDWQVT----NTNANGRTRLS--GNWTGDAEID-- 465
Paeruginosa ---DNATRLFEMTARYGLPYFQNFNSDMQPNQ---VRSMCCRLQLDVLRELLKRGNGLFG- 404
Pfuriosus  ---VFEAIFTTAAKRGSFYWLNTNVVDPDASY-----AMCCRLNIDKREFTYTFSLDEDV 296
Tmaritima  -----SARFINKINMKWQDTNWIISDSIDAVASCCRLTSSTQTLKFKFSLSSEEE 349
Kstuttgartensis QYELLEAYACQIASENGVPYFVFDRE-----DE-IT-LSACCRLRRTTIDDN--YMIKHP-- 490
Tacidaminovorans WEEFLELACRVASEKGNTYFVFDRE-----GG-VAKLSECCRLSFELSEEDLREAHQP-406
Aveneficus FDEFMILVHKCVAKYGTPTYFLNLLAGYLPD----NVFAQCCRLVLSPDANDWEDFAKG-- 406
Mbarkeri   YKELYRMTFELAAKFGTPTYFDNQLPEYRGAGE-GISCYQCLAYQFS--ANPTDDKEFDDK 466
          *

```

**Figure S8.** NrdD alignments created using ClustalW<sup>4</sup>. Blue text denotes formate-utilizing NrdDs. Black and red text denote putative disulfide-utilizing NrdDs. Red text denotes NrdDs with a thioredoxin in the operon. Putative residues involved in chemistry highlighted in green.

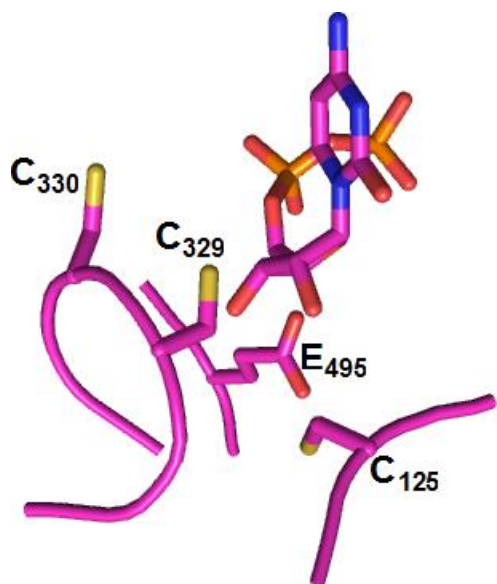

**Figure S9.** Homology model of *Thermotoga maritima* NrdD created using Phyre2.<sup>5</sup> Residues C330 and C125 are conserved in all RNRs. In addition, residues C329 and E495 are conserved in NrdDs related to *T. maritima* NrdD. We hypothesize that nucleotide reduction by *T. maritima* NrdD is accompanied by formation of a disulfide bond between C125 and C329.



## References

- (1) Logan, D. T.; Andersson, J.; Sjöberg, B.-M.; Nordlund, P. *Science* **1999**, *283*, 1499.
- (2) Schrödinger, LLC 2010.
- (3) Zimanyi, C. M. [PhD Thesis]; Massachusetts Institute of Technology: Cambridge, 2013.
- (4) Larkin, M. A.; Blackshields, G.; Brown, N. P.; Chenna, R.; McGettigan, P. A.; McWilliam, H.; Valentin, F.; Wallace, I. M.; Wilm, A.; Lopez, R.; Thompson, J. D.; Gibson, T. J.; Higgins, D. G. *Bioinformatics* **2007**, *23*, 2947.
- (5) Kelley, L. A.; Sternberg, M. J. *Nat. Protoc.* **2009**, *4*, 363.
